# Supplementary material
Source: MDPI journal article supplement (https://www.mdpi.com/2305-6320/8/11/72)
Supplement: s1 [file s1]

# Supplementary Materials: Neuron-Specific Enolase (NSE) Predicts Long-Term Mortality in Adult Patients after Cardiac Arrest: Results from a Prospective Trial

Jonas Müller, Benjamin Bissmann, Christoph Becker, Katharina Beck, Nina Loretz, Sebastian Gross, Simon A. Amacher, Chantal Bohren, Hans Pargger, Kai Tisljar, Raoul Sutter, Stephan Marsch and Sabina Hunziker

**Table S1:** Association between NSE serum levels at day 5 & 7 and long-term outcomes.

| Primary endpoint: Long-term mortality                        |     |                   |                                     |                                     |         |                                   |                                              |                                               |                   |
|--------------------------------------------------------------|-----|-------------------|-------------------------------------|-------------------------------------|---------|-----------------------------------|----------------------------------------------|-----------------------------------------------|-------------------|
|                                                              | N   | All               | Survivors                           | Non-Survivors                       | p-value | Univariable HR (95%CI), p-value   | Multivariable * adjusted HR (95%CI), p-value | Multivariable ** adjusted HR (95%CI), p-value | ROC AUC (95% CI)  |
| NSE day 5, median (IQR)                                      | 122 | 22.9 (15.4, 47.5) | 17.7 (13.8, 25.5)                   | 40.1 (18.8, 84.3)                   | <0.001  | 1.42 (1.27, 1.59), p<0.001        | 1.42 (1.26, 1.6), p<0.001                    | 1.44 (1.26, 1.65), p<0.001                    | 0.76 (0.68, 0.85) |
| NSE day 7, median (IQR)                                      | 78  | 21.4 (14.4, 33.3) | 20 (14.1, 26.3)                     | 24.9 (15.4, 45)                     | 0.040   | 1.14 (1.01, 1.29), p=0.028        | 1.17 (0.98, 1.39), p=0.076                   | 1.18 (1.05, 1.33), p=0.007                    | 0.64 (0.51, 0.76) |
| Secondary endpoint: Neurological outcome (CPC) after 2 years |     |                   |                                     |                                     |         |                                   |                                              |                                               |                   |
|                                                              | N   | All               | Good neurological outcome (CPC 1-2) | Poor neurological outcome (CPC 3-5) | p-value | Univariable (OR (95%CI), p-value) | Multivariable * adjusted OR (95%CI), p-value | Multivariable ** adjusted OR (95%CI), p-value | ROC AUC (95%CI)   |
| NSE day 5, median (IQR)                                      | 93  | 25.3 (17.3, 65.9) | 17.8 (14.1, 23.1)                   | 46 (22.4, 91.7)                     | <0.001  | 1.55 (1.27, 1.88), p<0.001        | 1.7 (1.3, 2.22), p<0.001                     | 1.52 (1.19, 1.93), p=0.001                    | 0.81 (0.72, 0.89) |
| NSE day 7, median (IQR)                                      | 57  | 22.6 (15.6, 34.5) | 19.3 (14.3, 27.4)                   | 26.2 (17.4, 42.7)                   | 0.068   | 1.19 (0.97, 1.46), p=0.095        | 1.37 (0.96, 1.96), P=0.086                   | 1.21 (0.95, 1.54), p=0.121                    | 0.65 (0.50, 0.80) |

Data presented as median (interquartile range) or mean (95% confidence interval). NSE, neuron specific enolase; CPC, cerebral performance category; HR, hazard ratio; OR, odds ratio; ROC, receiver operating characteristics curve; AUC, area under the curve; IQR interquartile range. \* adjusted for gender, age and comorbidities (coronary artery disease, congestive heart failure, COPD, hypertension, diabetes mellitus, chronic kidney disease, malignant disease, neurological disease). \*\* adjusted for gender, age and resuscitation circumstances (ROSC, setting of cardiac arrest, bystander CPR, initial rhythm, initial lactate).

**Table S2:** Performance of NSE serum levels at day 3 to predict mortality at different time points.

| Mortality   | Survivors below cutoff (n) | Survivors above cutoff (n) | Non-survivors below cutoff (n) | Non-survivors above cutoff (n) | Sensitivity Pr(+A), % (95%CI) | Specificity Pr(-N), % (95%CI) | ROC area, (95%CI) | Likelihood ratio (+), (95%CI) | Likelihood ratio (-), (95%CI) | PPV, % (95%CI)     | NPV, % (95%CI)     |
|-------------|----------------------------|----------------------------|--------------------------------|--------------------------------|-------------------------------|-------------------------------|-------------------|-------------------------------|-------------------------------|--------------------|--------------------|
| at 6 month  | 100                        | 26                         | 23                             | 76                             | 76.8% (67.2%-84.7%)           | 79.4% (71.2%-86.1%)           | 0.78 (0.73-0.84)  | 3.72 (2.60-5.33)              | 0.29 (0.20-0.42)              | 74.5% (64.9-82.6%) | 81.3% (73.3-87.8%) |
| at 12 month | 99                         | 26                         | 24                             | 76                             | 76.0% (66.4%-84.0%)           | 79.2% (71.0%-85.9%)           | 0.78 (0.72-0.83)  | 3.65 (2.55-5.23)              | 0.30 (0.21-0.43)              | 74.5% (64.9-82.6%) | 80.5% (72.4-87.1%) |
| at 18 month | 99                         | 26                         | 24                             | 76                             | 76.0% (66.4%-84.0%)           | 79.2% (71.0%-85.9%)           | 0.78 (0.72-0.83)  | 3.65 (2.55-5.23)              | 0.30 (0.21-0.43)              | 74.5% (64.9-82.6%) | 80.5% (72.4-87.1%) |
| at 24 month | 98                         | 26                         | 25                             | 76                             | 75.2% (65.7%-83.3%)           | 79.0% (70.8%-85.8%)           | 0.77 (0.72-0.83)  | 3.59 (2.50-5.14)              | 0.31 (0.22-0.45)              | 74.5% (64.9-82.6%) | 79.7% (71.5-86.4%) |

**Table S3:** Performance of NSE serum levels at cut-off 60ng/mL at day 3 to predict long-term outcomes.

| Overall long-term mortality                          |                                                      |                                                      |                                                      |                               |                               |                     |                               |                               |                      |                    |                     |                     |
|------------------------------------------------------|------------------------------------------------------|------------------------------------------------------|------------------------------------------------------|-------------------------------|-------------------------------|---------------------|-------------------------------|-------------------------------|----------------------|--------------------|---------------------|---------------------|
| Survivors below cutoff (n)                           | Survivors above cutoff (n)                           | Non-survivors below cutoff (n)                       | Non-survivors above cutoff (n)                       | Sensitivity Pr(+A), % (95%CI) | Specificity Pr(-N), % (95%CI) | ROC area, (95%CI)   | Likelihood ratio (+), (95%CI) | Likelihood ratio (-), (95%CI) | Hazard ratio (95%CI) | PPV, % (95%CI)     | NPV, % (95%CI)      |                     |
| NSE 60 ng/mL                                         | 105                                                  | 6                                                    | 53                                                   | 61                            | 53.5% (43.9%-62.9%)           | 94.6% (88.6%-98.0%) | 0.74 (0.69-0.79)              | 9.90 (4.46-21.96)             | 0.49 (0.40-0.60)     | 20.14 (8.35-48.39) | 91.0% (81.5%-96.6%) | 66.5% (58.5%-73.8%) |
| CPC after 2 years                                    |                                                      |                                                      |                                                      |                               |                               |                     |                               |                               |                      |                    |                     |                     |
| Good neurological outcome (CPC 1-2) below cutoff (n) | Good neurological outcome (CPC 1-2) above cutoff (n) | Poor neurological outcome (CPC 3-5) below cutoff (n) | Poor neurological outcome (CPC 3-5) above cutoff (n) | Sensitivity Pr(+A), % (95%CI) | Specificity Pr(-N), % (95%CI) | ROC area, (95%CI)   | Likelihood ratio (+), (95%CI) | Likelihood ratio (-), (95%CI) | Odds ratio (95%CI)   | PPV, % (95%CI)     | NPV, % (95%CI)      |                     |
| NSE 60 ng/mL                                         | 59                                                   | 3                                                    | 44                                                   | 61                            | 58.1% (48.1%-67.7%)           | 95.2% (86.5%-99.0%) | 0.77 (0.71-0.82)              | 12.01 (3.93-36.64)            | 0.44 (0.35-0.56)     | 27.27 (8.47-86.94) | 95.3% (86.9%-99.0%) | 57.3% (47.2%-67.0%) |

Neuron specific enolase at a cut-off 60ng/mL day 3; ROC, receiver operating curve; PPV, positive predictive value; NPV, negative predictive value.

**Table S4:** Performance of NSE serum levels on day 5 & day 7 at different cutoff points to predict overall long-term mortality.

|                      | Survivors<br>below<br>cutoff<br>(n) | Survivors<br>above<br>cutoff<br>(n) | Non-survivors<br>below<br>cutoff<br>(n) | Non-survivors<br>above<br>cutoff<br>(n) | Sensitivity<br>Pr(+A), %<br>(95%CI) | Specificity<br>Pr(-N), %<br>(95%CI) | ROC<br>area,<br>(95%CI) | Likelihood<br>ratio<br>(+),<br>(95%CI) | Likelihood<br>ratio (-<br>)<br>(95%CI) | Hazard<br>ratio<br>(95%CI) | PPV, %<br>(95%CI)   | NPV, %<br>(95%CI)   |
|----------------------|-------------------------------------|-------------------------------------|-----------------------------------------|-----------------------------------------|-------------------------------------|-------------------------------------|-------------------------|----------------------------------------|----------------------------------------|----------------------------|---------------------|---------------------|
| <b>Day 5<br/>NSE</b> |                                     |                                     |                                         |                                         |                                     |                                     |                         |                                        |                                        |                            |                     |                     |
| 33<br>ng/mL          | 54                                  | 9                                   | 26                                      | 33                                      | 55.9<br>(42.4-68.8)                 | 85.7<br>(74.6-93.3)                 | 0.71<br>(0.63-0.79)     | 3.29<br>(2.05-7.47)                    | 0.51<br>(0.38-0.70)                    | 7.62<br>(3.21-17.98)       | 78.6<br>(63.2-89.7) | 67.5<br>(56.1-77.6) |
| 27.4<br>ng/mL        | 51                                  | 12                                  | 23                                      | 36                                      | 61.0<br>(47.4-73.5)                 | 81.0<br>(69.1-89.8)                 | 0.71<br>(0.63-0.79)     | 3.20<br>(1.85-5.54)                    | 0.48<br>(0.34-0.68)                    | 6.65<br>(2.96-14.95)       | 75.0<br>(60.4-86.4) | 68.9<br>(57.1-79.2) |
| <b>Day 7<br/>NSE</b> |                                     |                                     |                                         |                                         |                                     |                                     |                         |                                        |                                        |                            |                     |                     |
| 33<br>ng/mL          | 33                                  | 5                                   | 25                                      | 15                                      | 37.5<br>(22.7-54.2)                 | 86.8<br>(71.9-95.6)                 | 0.62<br>(0.53-0.72)     | 2.85<br>(1.15-7.08)                    | 0.72<br>(0.55-0.94)                    | 3.96<br>(1.31-11.89)       | 75.0<br>(50.9-91.3) | 56.9<br>(43.2-69.8) |
| 26.2<br>ng/mL        | 28                                  | 10                                  | 21                                      | 19                                      | 47.5<br>(31.5-63.9)                 | 73.7<br>(56.9-86.6)                 | 0.61<br>(0.50-0.71)     | 1.80<br>(0.97-3.37)                    | 0.71<br>(0.50-1.01)                    | 2.53<br>(0.99-6.48)        | 65.5<br>(45.7-82.1) | 57.1<br>(42.2-71.2) |

At each day cutoff at 33 ng/mL as recommended and cutoff based on Youden index is shown. NSE Neuron specific enolase; ROC, receiver operating curve; PPV, positive predictive value; NPV, negative predictive value

**Table S5:** Performance of NSE serum levels at different cutoff points to predict neurological outcome after two years.

|                   | Good neurological outcome below cutoff (n) | Good neurological outcome above cutoff (n) | Poor neurological outcome below cutoff (n) | Poor neurological outcome above cutoff (n) | Sensitivity Pr(+A), % (95%CI) | Specificity Pr(-N), % (95%CI) | ROC area, (95%CI) | Likelihood ratio (+), (95%CI) | Likelihood ratio (-), (95%CI) | Odds ratio (95%CI) | PPV, % (95%CI)     | NPV, % (95%CI)     |
|-------------------|--------------------------------------------|--------------------------------------------|--------------------------------------------|--------------------------------------------|-------------------------------|-------------------------------|-------------------|-------------------------------|-------------------------------|--------------------|--------------------|--------------------|
| <b>Max. NSE</b>   |                                            |                                            |                                            |                                            |                               |                               |                   |                               |                               |                    |                    |                    |
| <b>33 ng/mL</b>   | 49                                         | 39                                         | 45                                         | 170                                        | 79.1% (73.0-84.3%)            | 55.7% (44.4-66.3%)            | 0.67 (0.61-0.73)  | 1.78 (1.4-2.28)               | 0.38 (0.27-0.52)              | 4.75 (2.79-8.08)   | 81.3% (75.4-86.4%) | 52.1% (41.6-62.5%) |
| <b>42.1 ng/mL</b> | 64                                         | 24                                         | 63                                         | 152                                        | 70.7% (64.1-76.7%)            | 72.7% (62.2-81.7%)            | 0.72 (0.66-0.77)  | 2.59 (1.82-3.69)              | 0.40 (0.32-0.51)              | 6.43 (3.71-11.16)  | 86.4% (80.4-91.1%) | 50.4% (41.4-59.4%) |
| <b>Day 0 NSE</b>  |                                            |                                            |                                            |                                            |                               |                               |                   |                               |                               |                    |                    |                    |
| <b>33 ng/mL</b>   | 40                                         | 28                                         | 72                                         | 107                                        | 59.8% (52.2-67.0%)            | 58.8% (46.2-70.6%)            | 0.59 (0.52-0.66)  | 1.45 (1.07-1.98)              | 0.68 (0.52-0.89)              | 2.12 (1.21-3.73)   | 79.3% (71.4-85.8%) | 35.7% (26.9-45.3%) |
| <b>34.7 ng/mL</b> | 44                                         | 24                                         | 76                                         | 103                                        | 57.5% (49.9-64.9%)            | 64.7% (52.2-75.9%)            | 0.61 (0.54-0.68)  | 1.63 (1.15-2.30)              | 0.66 (0.51-0.84)              | 2.48 (1.40-4.42)   | 81.1% (73.2-87.5%) | 36.7% (28.1-45.9%) |
| <b>Day 1 NSE</b>  |                                            |                                            |                                            |                                            |                               |                               |                   |                               |                               |                    |                    |                    |
| <b>33 ng/mL</b>   | 54                                         | 25                                         | 56                                         | 121                                        | 68.4% (61.0-75.1%)            | 68.4% (56.9-78.4%)            | 0.68 (0.62-0.75)  | 2.16 (1.54-3.03)              | 0.46 (0.36-0.60)              | 4.67 (2.65-8.23)   | 82.9% (75.8-88.6%) | 49.1% (39.4-58.8%) |
| <b>38 ng/mL</b>   | 62                                         | 17                                         | 66                                         | 111                                        | 62.7% (55.1-69.9%)            | 78.5% (67.8-86.9%)            | 0.71 (0.65-0.76)  | 2.91 (1.88-4.51)              | 0.48 (0.38-0.59)              | 6.13 (3.32-11.31)  | 86.7% (79.6-92.1%) | 48.4% (39.5-57.4%) |
| <b>Day 2 NSE</b>  |                                            |                                            |                                            |                                            |                               |                               |                   |                               |                               |                    |                    |                    |
| <b>33 ng/mL</b>   | 59                                         | 13                                         | 40                                         | 96                                         | 70.6% (62.2-78.1%)            | 81.9% (71.1-90.0%)            | 0.76 (0.70-0.82)  | 3.91 (2.37-6.47)              | 0.36 (0.27-0.48)              | 10.89 (5.42-21.87) | 88.1% (80.5-93.5%) | 59.6% (49.3-69.3%) |
| <b>31.9 ng/mL</b> | 57                                         | 15                                         | 37                                         | 99                                         | 72.8% (64.5-80.1%)            | 79.2% (68.0-87.8%)            | 0.76 (0.70-0.82)  | 3.49 (2.20-5.55)              | 0.34 (0.25-0.46)              | 10.17 (5.16-20.01) | 86.8% (79.2-92.4%) | 60.6% (50.0-70.6%) |
| <b>Day 3 NSE</b>  |                                            |                                            |                                            |                                            |                               |                               |                   |                               |                               |                    |                    |                    |
| <b>33 ng/mL</b>   | 52                                         | 10                                         | 26                                         | 79                                         | 75.2% (65.9-83.1%)            | 83.9% (72.3-92.0%)            | 0.80 (0.73-0.86)  | 4.66 (2.62-8.32)              | 0.30 (0.21-0.42)              | 15.80 (7.09-35.1)  | 88.8% (80.3-94.5%) | 66.7% (55.1-76.9%) |
| <b>37.1 ng/mL</b> | 54                                         | 8                                          | 28                                         | 77                                         | 73.3% (63.8-81.5%)            | 87.1% (76.1-94.3%)            | 0.80 (0.74-0.86)  | 5.68 (2.95-10.96)             | 0.31 (0.22-0.43)              | 18.56 (7.95-43.15) | 90.6% (82.3-95.8%) | 65.9% (54.6-76.0%) |

| Day 5<br>NSE  |    |   |    |    |                           |                           |                         |                          |                     |                           |                           |                           |
|---------------|----|---|----|----|---------------------------|---------------------------|-------------------------|--------------------------|---------------------|---------------------------|---------------------------|---------------------------|
| 33<br>ng/mL   | 34 | 3 | 22 | 34 | 60.7%<br>(46.8-<br>73.5%) | 91.9%<br>(78.1-<br>98.3%) | 0.76<br>(0.68-<br>0.84) | 7.49<br>(2.48-<br>22.61) | 0.43<br>(0.30-0.60) | 17.52<br>(5.04-<br>59.81) | 91.9%<br>(78.1-<br>98.3%) | 60.7%<br>(46.8-<br>73.5%) |
| 25.7<br>ng/mL | 32 | 5 | 18 | 38 | 67.9%<br>(54.0-<br>79.7%) | 86.5%<br>(71.2-<br>95.5%) | 0.77<br>(0.69-<br>0.85) | 5.02<br>(2.18-<br>11.57) | 0.37<br>(0.25-0.56) | 13.51<br>(4.62-<br>39.15) | 88.4%<br>(74.9-<br>96.1%) | 64.0%<br>(49.2-<br>77.1%) |
| Day 7<br>NSE  |    |   |    |    |                           |                           |                         |                          |                     |                           |                           |                           |
| 33<br>ng/mL   | 17 | 3 | 23 | 14 | 37.8%<br>(22.5-<br>55.2%) | 85.0%<br>(62.1-<br>96.8%) | 0.61<br>(0.50-<br>0.73) | 2.52<br>(0.82-<br>7.75)  | 0.73<br>(0.54-1.00) | 3.45<br>(0.9-<br>12.88)   | 82.4%<br>(56.6-<br>96.2%) | 42.5%<br>(27.0-<br>59.1%) |
| 21.7<br>ng/mL | 13 | 7 | 15 | 22 | 59.5%<br>(42.1-<br>75.2%) | 65.0%<br>(40.8-<br>84.6%) | 0.62<br>(0.49-<br>0.76) | 1.70<br>(0.88-<br>3.27)  | 0.62<br>(0.38-1.03) | 2.72<br>(0.90-<br>8.24)   | 75.9%<br>(56.5-<br>89.7%) | 44.1%<br>(27.2-<br>62.1%) |

At each day cutoff at 33 ng/mL as recommended and cutoff based on Youden index is shown. CPC 1-2 was considered good neurological outcome and CPC 3-5 as poor neurological outcome. NSE, neuron specific enolase; ROC, receiver operating curve; PPV, positive predictive value; NPV, negative predictive value.

**Table S6:** Performance of NSE serum levels to predict overall long-term mortality in patients aged 16–53.9 years.

| Overall Mortality    |                                  |                                  |                      |                    |                      |
|----------------------|----------------------------------|----------------------------------|----------------------|--------------------|----------------------|
| Max. NSE             | Sensitivity Pr(+A), %<br>(95%CI) | Specificity Pr(-N), %<br>(95%CI) | ROC area,<br>(95%CI) | PPV, % (95%CI)     | NPV, % (95%CI)       |
| 33 ng/mL             | 100.0% (88.8–100.0%)             | 44.6% (31.3–58.5%)               | 0.72 (0.66–0.79)     | 50.0% (37.0–63.0%) | 100.0% (86.3–100.0%) |
| <b>Day 0<br/>NSE</b> |                                  |                                  |                      |                    |                      |
| 33 ng/mL             | 71.4% (51.3–86.8%)               | 57.8% (42.2–72.3%)               | 0.65 (0.53–0.76)     | 51.3% (34.8–67.6%) | 76.5% (58.8–89.3%)   |
| <b>Day 1<br/>NSE</b> |                                  |                                  |                      |                    |                      |
| 33 ng/mL             | 88.9% (70.8–97.6%)               | 60.0% (45.9–73.0%)               | 0.74 (0.66–0.83)     | 52.2% (36.9–67.1%) | 91.7% (77.5–98.2%)   |
| <b>Day 2<br/>NSE</b> |                                  |                                  |                      |                    |                      |
| 33 ng/mL             | 92.0% (74.0–99.0%)               | 80.0% (66.3–90.0%)               | 0.86 (0.78–0.94)     | 69.7% (51.3–84.4%) | 95.2% (83.8–99.4%)   |
| <b>Day 3<br/>NSE</b> |                                  |                                  |                      |                    |                      |
| 33 ng/mL             | 100.0% (83.9–100.0%)             | 80.0% (65.4–90.4%)               | 0.90 (0.84–0.96)     | 70.0% (50.6–85.3%) | 100.0% (90.3–100.0%) |
| <b>Day 5<br/>NSE</b> |                                  |                                  |                      |                    |                      |
| 33 ng/mL             | 90.0% (55.5–99.7%)               | 83.3% (62.6–95.3%)               | 0.87 (0.74–0.99)     | 69.2% (38.6–90.9%) | 95.2% (76.2–99.9%)   |
| <b>Day 7<br/>NSE</b> |                                  |                                  |                      |                    |                      |
| 33 ng/mL             | 100.0% (29.2–100.0%)             | 83.3% (58.6–96.4%)               | 0.92 (0.83–1.00)     | 50.0% (11.8–88.2%) | 100.0% (78.2–100.0%) |

Cutoff at 33 ng/mL as recommended is shown; NSE, neuron specific enolase; ROC, receiver operating curve; PPV, positive predictive value; NPV, negative predictive value.
